# Supplementary material for: Differential effects of ‘resurrecting' Csp pseudoproteases during Clostridioides difficile spore germination
Source: PubMed Central journal article supplement — Biochem J. 2020 Apr 27;477(8):1459–78. doi: 10.1042/BCJ20190875 (PMC7200643; doi:10.1042/bcj20190875), 2020-04-27
Supplement: BCJ-477-1459-s1.pdf [file BCJ-477-1459-s1.pdf]

**Figure S1. The CspB prodomain can be supplied *in trans* to largely reconstitute CspB function.**

(A) Schematic of wild-type CspBA and a construct encoding the prodomain *in trans* (Q66<sub>TAG</sub>).

“Pro” denotes the prodomain. Q66-TAG encodes a variant in which the CspB prodomain is produced *in trans* from the remainder of CspBA through the introduction of a stop codon after codon 66 and a ribosome binding site and start codon before codon 67. (B) Western blot analyses of CspB(A) and CspC in sporulating cells and purified spores from wild type 630 $\Delta$ *erm-p*,  $\Delta$ *cspBA*, and  $\Delta$ *cspBA* complemented with either wild-type *cspBA* or the *cspBA* trans-complementation variant. A-P refers to CspB(A) that has undergone autoprocessing to release the CspB prodomain.  $\Delta$ *spo0A* ( $\Delta$ 0A) was used as a negative control for sporulating cells. SpoIVA was used as a loading control for sporulating cells, while CotA was used as a loading control for purified spores. An anti-CspB antibody was used to detect full-length CspBA in sporulating cells. A non-specific band in the anti-CspB blot is indicated with an asterisk. The germination efficiency of spores from the indicated strains plated on BHIS media containing 0.1% taurocholate is also shown relative to wild type. The mean and standard deviations shown are based on multiple replicates performed on two independent spore purifications. Statistical significance relative to wild type was determined using a one-way ANOVA and Tukey’s test. (C) Germinant sensitivity of Q66<sub>TAG</sub> spores plated on BHIS containing increasing concentrations of taurocholate. The number of colony forming units (CFUs) produced by germinating spores is shown. The mean and standard deviations shown are based on multiple replicates performed on two independent spore purifications. Statistical significance relative to wild type was determined using a one-way ANOVA and Tukey’s test. \*\*\*\* p < 0.0001, \*\*\* p < 0.001, \*\*p < 0.01.

**Figure S2. Restoring CspC's catalytic triad appears to impair protein folding in *E. coli*.** (A)

CspC space fill model with jelly roll domain in cyan, prodomain in pink and subtilase domain in grey. Residues identified as being required for *C. difficile* spore germination by Francis et al. [1] in a genetic screen are shown in black. The S443N substitution was identified in combination with V272G. The pseudoactive site residues Thr170 and Gly485 are shown in blue. (B)

Purification of CspC-His<sub>6</sub> variants from the soluble fraction. G171R was included because this substitution had been predicted to destabilize CspC by steric occlusion [2, 3]. Cultures expressing the *cspC* variants were induced with IPTG overnight at 18°C, and aliquots were removed for analysis of the “induced” fraction. Cultures were harvested, and cells were lysed using sonication. Following a high-speed centrifugation, the cleared lysate containing soluble proteins was incubated with Ni<sup>2+</sup>-NTA agarose beads. CspC-His<sub>6</sub> variants were eluted from the beads using imidazole (elution fraction). Equivalent volumes of samples were resolved by SDS-PAGE and analyzed by western blotting (top) and Coomassie staining (bottom).

**Figure S3. Purification of CspC variants using the CPD self-cleaving tag and SEC.** (A)

Coomassie stains of the CspC-CPD-His<sub>6</sub> purifications. The variants purified are listed above the gels. “+” shows IPTG-induced cell lysates; CL refers to the soluble proteins present in cleared lysates of IPTG-induced cell lysates; E1 and E2 refer to the elutions obtained from the supernatant fraction following inositol hexakisphosphate (InsP<sub>6</sub>)-induced cleavage of CspC-CPD-His<sub>6</sub> variants. CspC<sub>EL</sub> refers to the glutamate and leucine residues that are added to the C-terminus of the CspC variants following InsP<sub>6</sub>-mediated cleavage. We note that WT CspC-CPD was present in higher levels in the cleared lysate fraction than the other CspC variants. (B) SEC profiles of CspC<sub>2xcat</sub> and CspC<sub>G171R</sub> variants. These traces are identical to those shown in **Figure**

**3**, except the y-axis has been scaled for these variants, which are purified with much lower yields. The black rectangle and blue and pink arrows identify the fraction that contained these variants. (C) Coomassie stain of fractions taken from the SEC shown in (B). The black rectangle highlights the fraction that was concentrated for the thermal shift assays and Coomassie gels shown in **Figure 3**. Lane 1 in the bottom gel includes SEC-purified CspC<sub>T170H</sub>, which highlights how CspC<sub>G171R</sub> runs at a slightly smaller apparent MW relative to CspC<sub>T170H</sub> (and WT CspC, **Figure 3**). This slight difference in mobility is likely due to CPD-mediated trimming of the partially unfolded CspC<sub>2xcat</sub> and CspC<sub>G171R</sub> variants (compare the mobility of these variants in Figure 3 vs. S3). The CPD cleaves after leucine residues [4], and CspC carries a leucine at its C-terminus (residue 557) prior to the LEHHHHHH tag created by the pET22b cloning construct as well as a leucine at position 544.

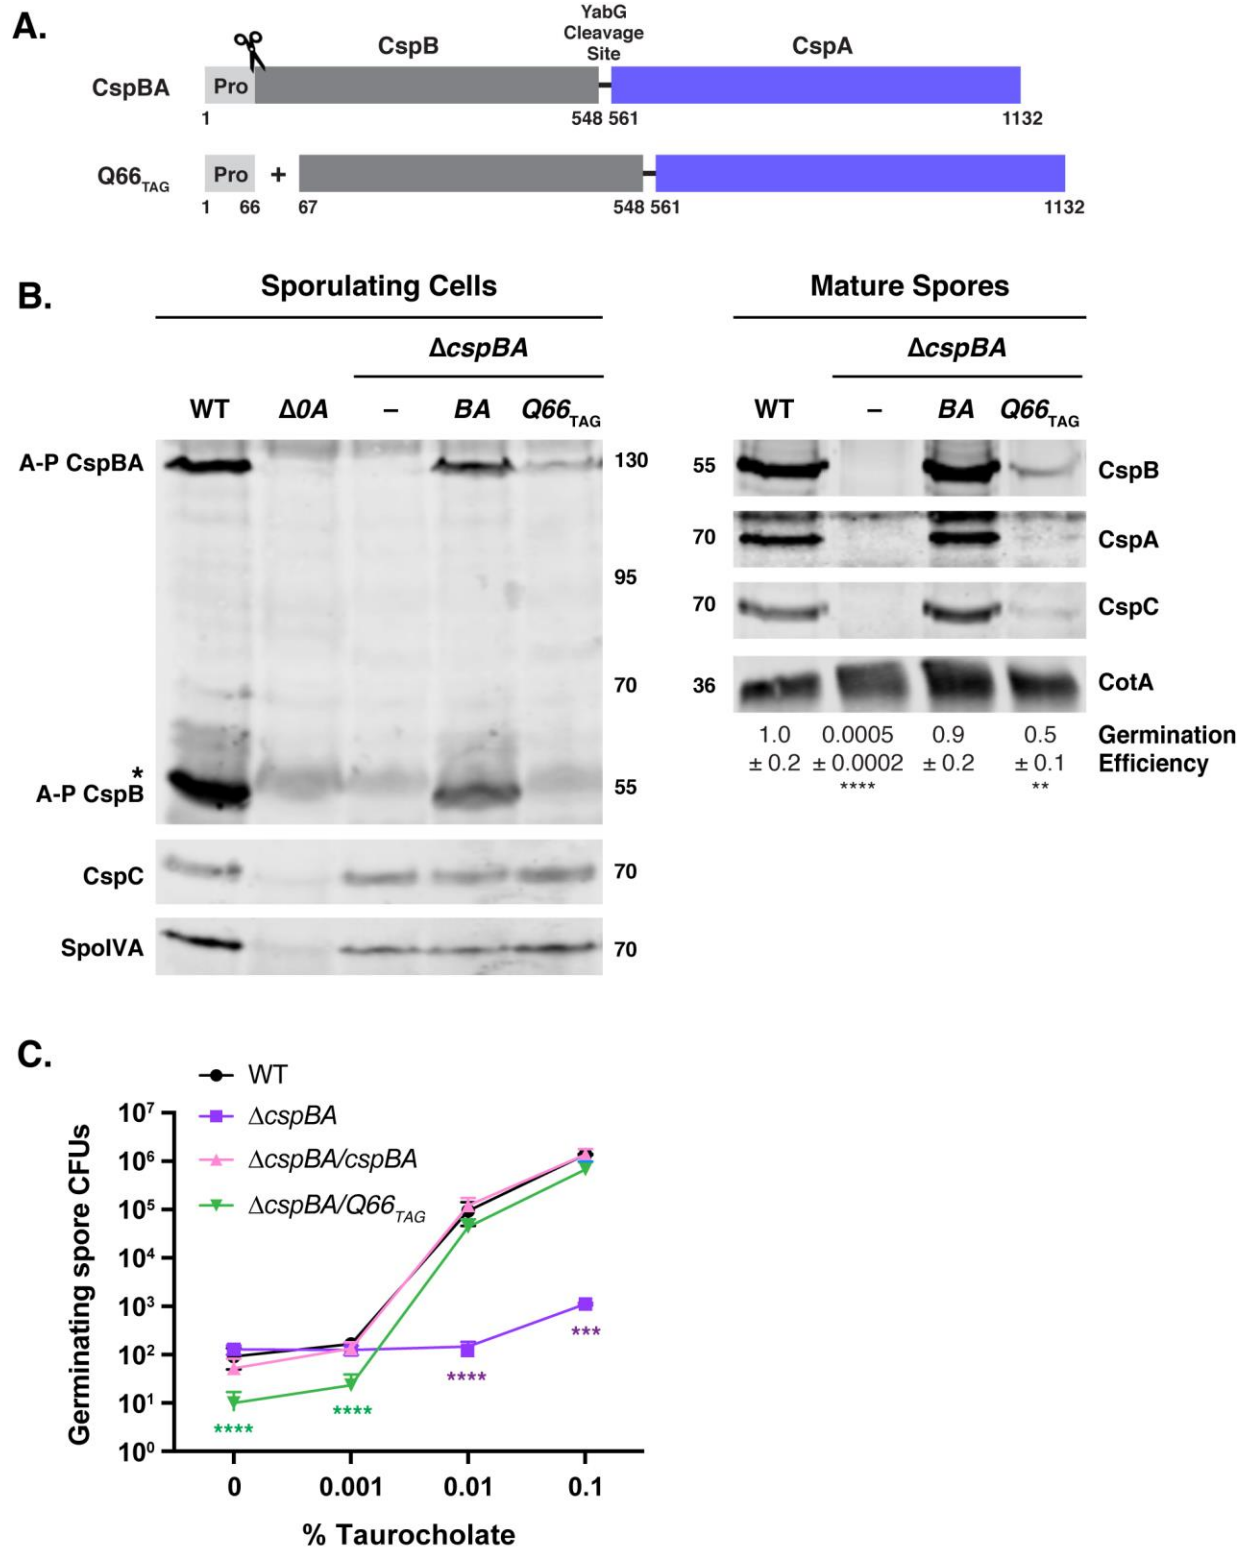

Figure S1. The CspB prodomain can be supplied *in trans* to largely re-constitute CspB function

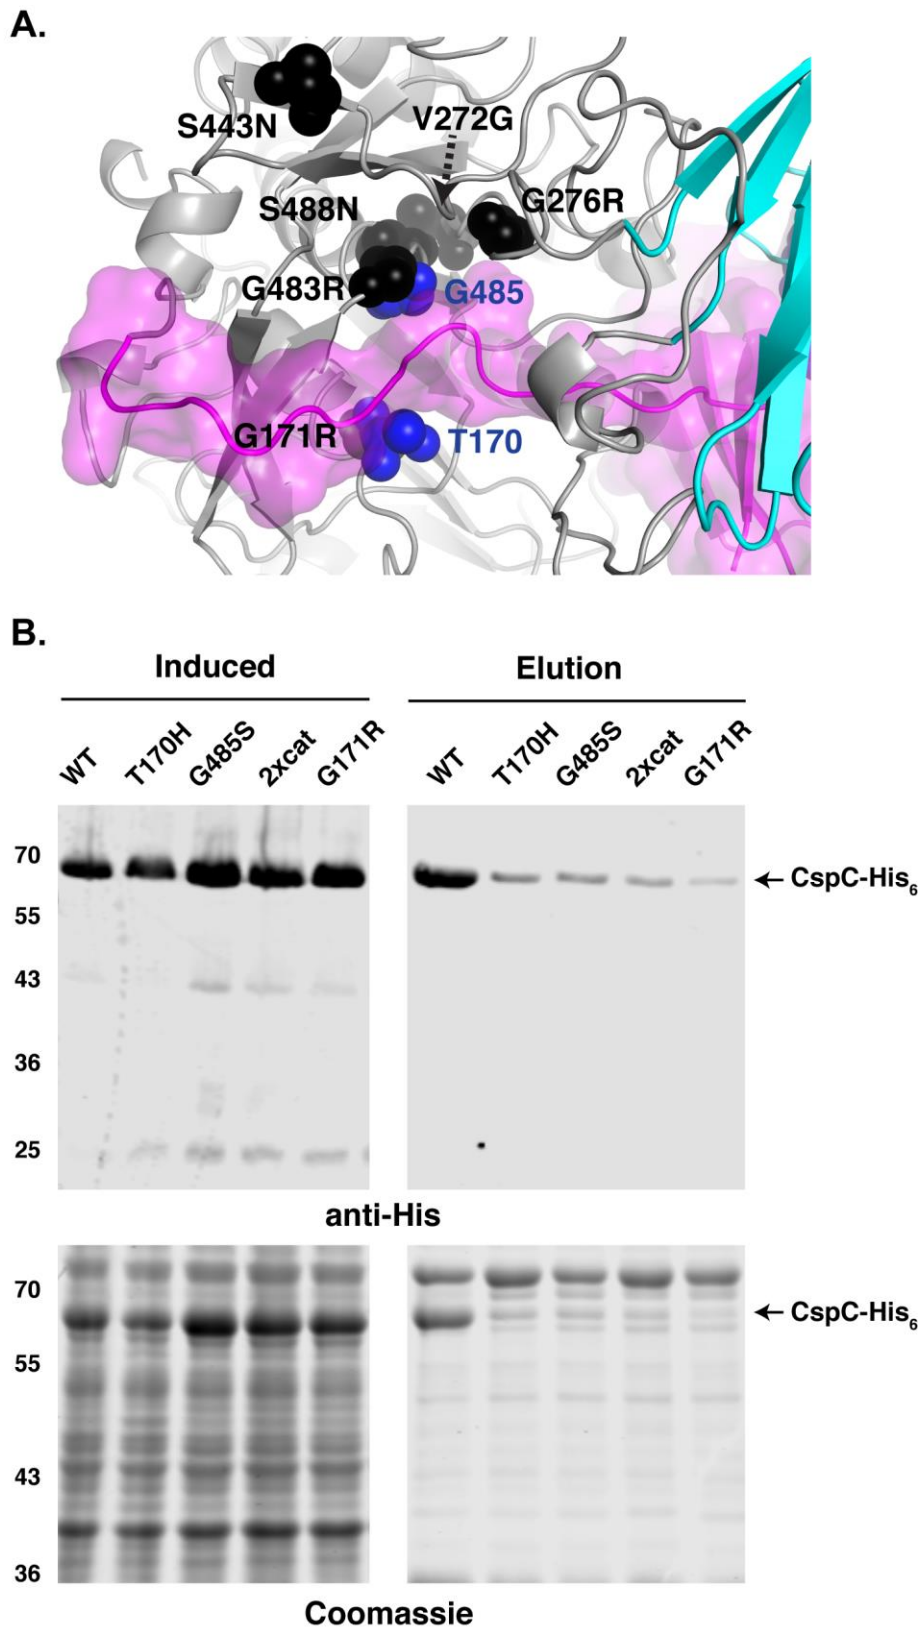

Figure S2. Restoring CspC's catalytic triad appears to impair folding in *E. coli*.

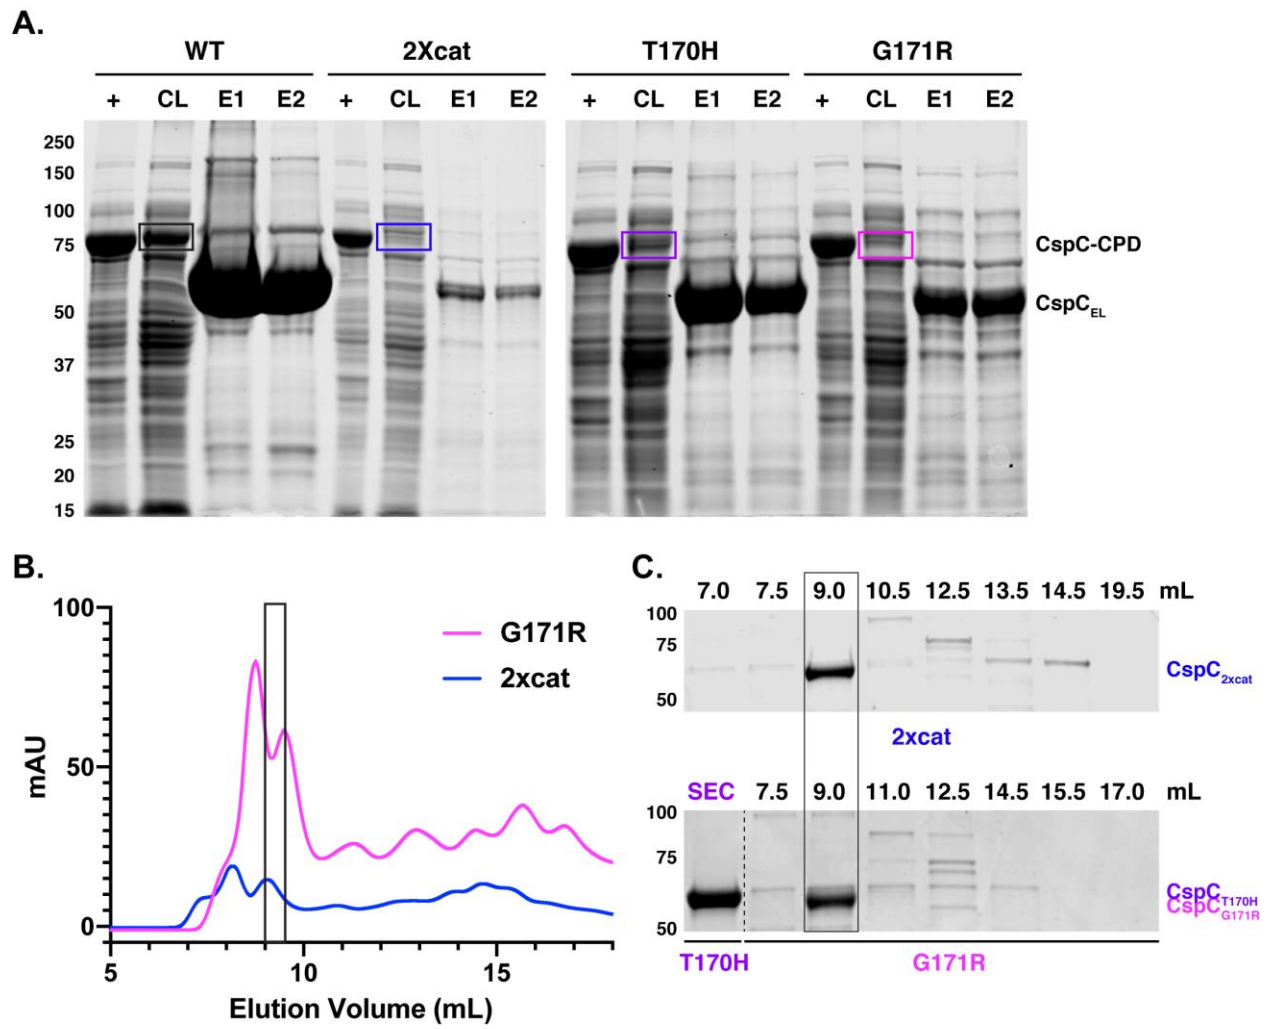

Figure S3. Purification of CspC variants using the CPD self-cleaving tag and SEC.

**Supplementary Table S1** – *C. difficile* and *E. coli* strains used in this study.

| Strain#                            | Strain name                                                                    | Relevant genotype or features                                                                                                                                                                      | Source/reference |
|------------------------------------|--------------------------------------------------------------------------------|----------------------------------------------------------------------------------------------------------------------------------------------------------------------------------------------------|------------------|
| <b><i>C. difficile</i> strains</b> |                                                                                |                                                                                                                                                                                                    |                  |
| 789                                | 630 $\Delta$ <i>erm</i> $\Delta$ <i>pyrE</i> $\Delta$ <i>cspBA</i>             | 630 $\Delta$ <i>erm</i> $\Delta$ <i>pyrE</i> with <i>cspBA</i> deleted                                                                                                                             | [5]              |
| 799                                | 630 $\Delta$ <i>erm</i> $\Delta$ <i>pyrE</i> $\Delta$ <i>cspC</i>              | 630 $\Delta$ <i>erm</i> $\Delta$ <i>pyrE</i> with <i>cspC</i> deleted                                                                                                                              | [6]              |
| 831                                | 630 $\Delta$ <i>erm</i> $\Delta$ <i>cspC/cspC</i>                              | 630 $\Delta$ <i>erm</i> $\Delta$ <i>cspC</i> with <i>cspC</i> in the <i>pyrE</i> locus                                                                                                             | [6]              |
| 846                                | 630 $\Delta$ <i>erm</i> -p                                                     | <i>erm</i> -sensitive derivate of 630 with <i>pyrE</i> restored                                                                                                                                    | [5]              |
| 849                                | 630 $\Delta$ <i>erm</i> $\Delta$ <i>spo0A</i> -p                               | 630 $\Delta$ <i>erm</i> $\Delta$ <i>spo0A</i> with <i>pyrE</i> restored                                                                                                                            | [5]              |
| 859                                | 630 $\Delta$ <i>erm</i> $\Delta$ <i>cspBA</i> -p                               | 630 $\Delta$ <i>erm</i> $\Delta$ <i>cspBA</i> with <i>pyrE</i> restored                                                                                                                            | [6]              |
| 862                                | 630 $\Delta$ <i>erm</i> $\Delta$ <i>cspBA/cspBA</i>                            | 630 $\Delta$ <i>erm</i> $\Delta$ <i>cspBA</i> with <i>cspBA</i> in the <i>pyrE</i> locus                                                                                                           | [6]              |
| 1238                               | 630 $\Delta$ <i>erm</i> $\Delta$ <i>cspC</i> -p                                | 630 $\Delta$ <i>erm</i> $\Delta$ <i>cspC</i> with <i>pyrE</i> restored                                                                                                                             | [6]              |
| 1438                               | 630 $\Delta$ <i>erm</i> - $\Delta$ <i>cspC/cspC</i> <sub>T170H</sub>           | 630 $\Delta$ <i>erm</i> $\Delta$ <i>cspC</i> with <i>cspC</i> <sub>T170H</sub> in the <i>pyrE</i> locus                                                                                            | This study       |
| 1441                               | 630 $\Delta$ <i>erm</i> - $\Delta$ <i>cspC/cspC</i> <sub>G485S</sub>           | 630 $\Delta$ <i>erm</i> $\Delta$ <i>cspC</i> with <i>cspC</i> <sub>G485S</sub> in the <i>pyrE</i> locus                                                                                            | This study       |
| 1751                               | 630 $\Delta$ <i>erm</i> $\Delta$ <i>cspC/cspC</i> <sub>L64-TAG</sub>           | 630 $\Delta$ <i>erm</i> $\Delta$ <i>cspC</i> with <i>cspC</i> <sub>L64-TAG</sub> in the <i>pyrE</i> locus                                                                                          | This study       |
| 1768                               | 630 $\Delta$ <i>erm</i> $\Delta$ <i>cspC/cspC</i> <sub>T170H/G485S</sub>       | 630 $\Delta$ <i>erm</i> $\Delta$ <i>cspC</i> with <i>cspC</i> <sub>T170H/G485S</sub> in the <i>pyrE</i> locus                                                                                      | This study       |
| 1864                               | 630 $\Delta$ <i>erm</i> $\Delta$ <i>cspBA/cspBA</i> <sub>Q66-TAG</sub>         | 630 $\Delta$ <i>erm</i> $\Delta$ <i>cspBA</i> with <i>cspBA</i> <sub>Q55-TAG</sub> in the <i>pyrE</i> locus                                                                                        | This study       |
| 2517                               | 630 $\Delta$ <i>erm</i> -p $\Delta$ <i>cspBA/cspBA</i> <sub>Q757H</sub>        | 630 $\Delta$ <i>erm</i> $\Delta$ <i>cspBA</i> with <i>cspBA</i> $\Delta$ <i>C</i> <sub>Q757H</sub> in the <i>pyrE</i> locus                                                                        | This study       |
| 2520                               | 630 $\Delta$ <i>erm</i> -p $\Delta$ <i>cspBA/cspBA</i> <sub>A1064S</sub>       | 630 $\Delta$ <i>erm</i> $\Delta$ <i>cspBA</i> with <i>cspBA</i> $\Delta$ <i>C</i> <sub>A1064S</sub> in the <i>pyrE</i> locus                                                                       | This study       |
| 2559                               | 630 $\Delta$ <i>erm</i> -p $\Delta$ <i>cspBA/cspBA</i> <sub>Q757H/A1064S</sub> | 630 $\Delta$ <i>erm</i> $\Delta$ <i>cspBA</i> with <i>cspBA</i> $\Delta$ <i>C</i> <sub>Q757H/A1064S</sub> in the <i>pyrE</i> locus                                                                 | This study       |
| <b><i>E. coli</i> strains</b>      |                                                                                |                                                                                                                                                                                                    |                  |
| Strain#                            | Strain Background                                                              | Plasmid carried                                                                                                                                                                                    |                  |
| 41                                 | DH5 $\alpha$                                                                   | F- $\Phi$ 80 <i>lacZ</i> $\Delta$ M15 $\Delta$ ( <i>lacZYA-argF</i> ) U169 <i>recA1 endA1 hsdR17</i> (rK <sup>-</sup> , mK <sup>+</sup> ) <i>phoA supE44</i> $\lambda$ - <i>thi-1 gyrA96 relA1</i> | D. Cameron       |
| 455                                | BL21                                                                           | pET28a- <i>cspB</i> (548aa)                                                                                                                                                                        | [7]              |
| 471                                | BL21                                                                           | pET28a- <i>cspB</i> (548aa)-S461A                                                                                                                                                                  | [7]              |
| 531                                | HB101/pRK24                                                                    | F- <i>mcrB mrr hsdS20</i> (rB <sup>-</sup> mB <sup>-</sup> ) <i>recA13 leuB6 ara-13 proA2 lavYI galK2 xyl-6 mtl-1 rpsL20</i> carrying pRK24                                                        | C. Ellermeier    |
| 981                                | BL21(DE3)                                                                      | pET22b <i>cspC</i> -His <sub>6</sub> codon-optimized                                                                                                                                               | This study       |
| 982                                | BL21                                                                           | pET22b <i>cspC</i> -CPD codon-optimized                                                                                                                                                            | This study       |
| 1185                               | BL21                                                                           | pET22b <i>cspC</i> <sub>T170H</sub> -CPD codon-optimized                                                                                                                                           | This study       |
| 1169                               | BL21                                                                           | pET22b <i>cspC</i> <sub>G171R</sub> -CPD codon-optimized                                                                                                                                           | This study       |
| 1281                               | BL21(DE3)                                                                      | pET28a <i>cspBA</i> codon-optimized                                                                                                                                                                | This study       |
| 1889                               | HB101                                                                          | pMTL-YN1C $\Delta$ <i>cspBA-cspC</i> <sub>T170H</sub>                                                                                                                                              | This study       |
| 1890                               | HB101                                                                          | pMTL-YN1C $\Delta$ <i>cspBA-cspC</i> <sub>G485S</sub>                                                                                                                                              | This study       |
| 2018                               | HB101                                                                          | pMTL-YN1C $\Delta$ <i>cspBA-cspC</i> <sub>T170H/G485Sr</sub>                                                                                                                                       | This study       |
| 2062                               | HB101                                                                          | pMTL-YN1C $\Delta$ <i>cspBA-cspC</i> <sub>L64-TAG</sub>                                                                                                                                            | This study       |
| 2076                               | HB101                                                                          | pMTL-YN1C <i>cspBA</i> <sub>Q66-TAG</sub> - $\Delta$ <i>cspC</i>                                                                                                                                   | This study       |
| 2098                               | BL21(DE3)                                                                      | pET22b <i>cspC</i> <sub>T170H/G485S</sub> -His <sub>6</sub> codon-optimized                                                                                                                        | This study       |
| 2099                               | BL21(DE3)                                                                      | pET22b <i>cspC</i> <sub>G485S</sub> -His <sub>6</sub> codon-optimized                                                                                                                              | This study       |
| 2126                               | BL21(DE3)                                                                      | pET22b <i>cspC</i> <sub>T170H</sub> -His <sub>6</sub> codon-optimized                                                                                                                              | This study       |
| 2127                               | BL21(DE3)                                                                      | pET22b <i>cspC</i> <sub>G171R</sub> -His <sub>6</sub> codon-optimized                                                                                                                              | This study       |
| 2368                               | HB101                                                                          | pMTL-YN1C <i>cspBA</i> $\Delta$ <i>C</i> <sub>A1064S</sub>                                                                                                                                         | This study       |
| 2370                               | HB101                                                                          | pMTL-YN1C <i>cspBA</i> $\Delta$ <i>C</i> <sub>Q757H</sub>                                                                                                                                          | This study       |
| 2382                               | HB101                                                                          | pMTL-YN1C <i>cspBA</i> $\Delta$ <i>C</i> <sub>Q757H/A1064S</sub>                                                                                                                                   | This study       |

|      |           |                                                                |            |
|------|-----------|----------------------------------------------------------------|------------|
| 2372 | BL21(DE3) | pET28a <i>cspBA</i> <sub>Q757H</sub> codon-optimized           | This study |
| 2384 | BL21(DE3) | pET28a <i>cspBA</i> <sub>A1064S</sub> codon-optimized          | This study |
| 2385 | BL21(DE3) | pET28a <i>cspBA</i> <sub>Q757H/A1064S</sub> codon-optimized    | This study |
| 2646 | BL21      | pET22b <i>cspC</i> <sub>T170H/G485S</sub> -CPD codon-optimized | This study |

### Plasmids

| Plasmids                   | Relevant features                                                                                     | Source/reference |
|----------------------------|-------------------------------------------------------------------------------------------------------|------------------|
| pMTL-YN1C                  | Unstable plasmid for restoring <i>pyrE</i> locus in 630Δ <i>erm</i> <i>pyrE</i>                       | [8]              |
| pET22b                     | Expression vector for IPTG-inducible production of C-terminally His <sub>6</sub> -tagged proteins     | Novagen          |
| pET28a                     | Expression vector for IPTG-inducible production of His <sub>6</sub> -tagged proteins                  | Novagen          |
| pET22b-CPD <sub>SacI</sub> | Expression vector for IPTG-inducible production of C-terminally CPD-His <sub>6</sub> -tagged proteins | [9]              |





|      |                                                                     |                                                                          |
|------|---------------------------------------------------------------------|--------------------------------------------------------------------------|
| 3034 | 5' NcoI <i>cspBA</i> CO<br>pET28a Gibson<br>3' XhoI <i>cspBA</i> CO | CTTTAAGAAGGAGATATA <u>CCATGG</u> CTATTATCATTAATTACGAACTGATTGTGAA<br>GTAC |
| 3035 | pET28a Gibson<br>5' Q757H SOE <i>cspBA</i>                          | CAGTGGTGGTGGTGGTGGT <u>GCTCGAGG</u> CGCAGTACATCAAACATGCCACG              |
| 3036 | codon opt<br>3' Q757H rev eos <i>cspBA</i>                          | CTCTCTCAGGATGAGGTGCGGTCACGGCACCATGCTGTCCGGCATCTGCTC                      |
| 3037 | codon opt<br>5' A1064S SOE <i>cspBA</i>                             | GAGCAGATGCCGGACAGCATGGTGCCGTGACCGACCTCATCCTGAGAGAG                       |
| 3038 | codon opt<br>3' A1064S rev eos                                      | CAATACATATGCAACCATTACTGGGACCTCAGCGGCGAGCGCGCATGCGGCTG                    |
| 3039 | <i>cspBA</i> codon opt<br>5' Q757H SOE <i>cspBA</i>                 | CAGCCGCATGCGCGCTCGCCGCTGAGGTCCCAGTAATGGTTGCATATGTATTG                    |
| 3040 | 630<br>3' Q757H rev eos <i>cspBA</i>                                | CTAGTCTATCTCAGGATGAAGTTGGTCATGGA ACTATGTTGAGTGGGATATGTGC                 |
| 3041 | 630                                                                 | GCACATATCCCACTCAACATAGTTCATGACCAACTTCATCCTGAGATAGACTAG                   |

<sup>a</sup>Restriction sites are underlined

### Supplementary Table S3– Peptostreptococcaceae CspBA homologs

| Organism genus and species             | Accession      |     | CspB |         |     | CspA |          |  |
|----------------------------------------|----------------|-----|------|---------|-----|------|----------|--|
| <i>Clostridioides difficile</i> 630    | CAJ69133.1     | DSG | HGTH | GTSMATP | DTG | HGTM | GTSAAAA  |  |
| <i>Clostridioides difficile</i> R20291 | CDR20291_2147  | DSG | HGTH | GTSMATP | DSG | RGTM | GTAASA   |  |
| <i>Clostridioides difficile</i> Y165   | EQI24072.1     | DSG | HGTH | GTSMATP | GSG | YGTI | GTAASAS  |  |
| <i>Romboutsia maritimum</i>            | WP_095405957.1 | DSG | HGTH | GTSMATP | DTG | SGTM | GTAVAAA  |  |
| <i>Romboutsia weinsteini</i>           | WP_094368045.1 | DSG | HGTH | GTSMATP | DSG | NGTM | GTAPAAA  |  |
| <i>Romboutsia sp. Marseille-P6047</i>  | WP_122638576.1 | DSG | HGTH | GTSMATP | DSG | NGTM | GTAPAAA  |  |
| <i>Romboutsia lituseburensis</i>       | WP_092722645.1 | DSG | HGTH | GTSMATP | DSG | NGTM | GTAPAAA  |  |
| <i>Paeniclostridium sordellii</i>      | CEN89310.1     | DSG | HGTH | GTSMATP | DSG | TGTM | GTAASAA  |  |
| <i>Paeniclostridium sordellii</i>      | WP_081015910.1 | DSG | HGTH | GTSMATP | DSG | SGTM | GTAPAAA  |  |
| <i>Paeniclostridium sordellii</i>      | CEQ11710.1     | DSG | HGTH | GTSMATP | DSG | HGTM | GTSAAAGA |  |
| <i>Romboutsia hominis</i>              | CEI72315.1     | DSG | HGTH | GTSMATP | DSG | SGTM | GTAPAAA  |  |
| <i>Romboutsia timonensis</i>           | WP_071121078.1 | DSG | HGTH | GTSMATP | DSG | HGTM | GTSAAAGA |  |
| <i>Paraclostridium bifermentans</i>    | WP_142730225.1 | DSG | HGTH | GTSMATP | DSG | TGTL | GTSAAAA  |  |
| <i>Romboutsia ilealis</i>              | CED93323.1     | DSG | HGTH | GTSMATP | DTG | HGTM | GSSAAGA  |  |
| <i>Paraclostridium bifermentans</i>    | WP_025162001.1 | DSG | HGTH | GTSMATP | DTG | HGTM | GSSAAGA  |  |
| <i>Peptostreptococcaceae bacterium</i> | WP_148487629.1 | DSG | HGTH | GTSMATP | DTG | HGTM | GSSAAGA  |  |

|                                       |                |     |      |         |     |      |         |
|---------------------------------------|----------------|-----|------|---------|-----|------|---------|
| <i>Paraclostridium bifermentans</i>   | WP_148550927.1 | DSG | HGTH | GTSMATP | DSG | SGTL | GTAASSA |
| <i>Paraclostridium benzoelyticum</i>  | OXX84749.1     | DSG | HGTH | GTSMATP | DSG | SGTL | GTAASSA |
| <i>Paraclostridium benzoelyticum</i>  | WP_046823062.1 | DSG | HGTH | GTSISAA | DSG | SGTM | GTAVAAA |
| <i>Terrisporobacter glycolicus</i>    | WP_148557837.1 | DSG | HGTH | GTSISAA | DSG | SGTM | GTAVAAA |
| <i>Terrisporobacter glycolicus</i>    | WP_083399335.1 | DSG | HGTH | GTSMATP | DSG | TGTL | GTAAAAA |
| <i>Romboutsia lituseburensis</i>      | WP_092722648.1 | DSG | HGTH | GTSMATP | DSG | TGTL | GTAAAAA |
| <i>Romboutsia lituseburensis</i>      | SDL34486.1     | DSG | HGTH | GTSMATP | DSG | SGTL | GTAASAA |
| <i>Terrisporobacter othiniensis</i>   | KHS58529.1     | DSG | HGTH | GTSMATP | DTG | SGTL | GTSAAAA |
| <i>Terrisporobacter othiniensis</i>   | WP_082007783.1 | DSG | HGTH | GTSMATP | DTG | SGTL | GTSAAAA |
| <i>Terrisporobacter glycolicus</i>    | WP_018589409.1 | DSG | HGTH | GTSMATP | DTG | SGTL | GTSAAAA |
| <i>Intestinibacter bartlettii</i>     | WP_055088383.1 | DSE | NNED | -----   | DSG | HGTM | GTAPAAA |
| <i>Intestinibacter bartlettii</i>     | WP_078687908.1 | DSG | HGTH | GTSMSAP | DSG | HGTL | GTSAGA  |
| <i>Intestinibacter bartlettii</i>     | WP_147616711.1 | DSG | HGTH | GTSMAAP | DSG | HGTR | GTSASGA |
| <i>Asaccharospora irregularis</i>     | WP_073125354.1 | DSG | HGTH | GTSMAAP | DSG | HGTK | GTSASAA |
| <i>Tepidibacter mesophilus</i>        | WP_099188795.1 | DSG | HGTH | GTSMAAP | DSG | HGTM | GTSVAAA |
| <i>Tepidibacter formicigenes</i>      | WP_072888171.1 | DSG | HGTH | GTSMAAP | DSG | HGTM | GTSVAAA |
| <i>Tepidibacter thalassicus</i>       | WP_084601981.1 | DSG | HGTH | GTSMAAP | DSG | HGTM | GTSVAAA |
| <i>Clostridium paradoxum</i>          | WP_083528235.1 | DSG | HGTH | GTSMATP | DTG | QGTM | GTAASA  |
| <i>Clostridium paradoxum</i>          | KXZ39276.1     | DSG | HGTH | GTSMATP | DTG | QGTM | GTAASA  |
| <i>Clostridium thermoalcaliphilum</i> | WP_079411776.1 | DSG | HGTH | GTSMATP | DTG | QGTM | GTAASA  |

**Supplementary Table S4. Peptostreptococcaceae CspC homologs.**

| <b>Organism genus and species</b>          | <b>Accession</b> |     | <b>CspC</b> |         |
|--------------------------------------------|------------------|-----|-------------|---------|
| <i>Clostridium difficile</i> 630           | CAJ69132.1       | DSG | TGTM        | GTGVSAS |
| <i>Clostridioides difficile</i> R20291     | 6MW4_A           | DSG | TGTI        | GTGISSS |
| <i>Clostridioides difficile</i> Y165       | EQF98486.1       | DSG | TGTI        | GTGISSS |
| <i>Romboutsia weinsteini</i>               | WP_094368046.1   | DSG | TGTI        | GTGVSSS |
| <i>Romboutsia maritimum</i>                | WP_115975881.1   | DSG | TGTI        | GTGVSSS |
| <i>Romboutsia maritimum</i>                | WP_115975890.1   | DSG | TGTI        | GTGVSSS |
| <i>Paeniclostridium sordellii</i>          | WP_055341573.1   | DSG | TGTM        | GTGVSSS |
| <i>Paeniclostridium sordellii</i>          | WP_057564142.1   | DSG | TGTT        | GTGVSSS |
| <i>Paeniclostridium sordellii</i>          | CEK30389.1       | DSG | TGTT        | GTGVSSS |
| <i>Clostridium dakareense</i>              | WP_042275205.1   | DSG | TGTM        | GTGVSSS |
| <i>Clostridiales</i>                       | WP_053830978.1   | DSG | TGTT        | GTGVSSS |
| <i>Paraclostridium bifermentans</i>        | WP_148550882.1   | DSG | TGTT        | GTGVSSS |
| <i>Romboutsia</i> sp. MT17                 | WP_092926789.1   | DSG | TGTM        | GTGVSSS |
| <i>Paraclostridium bifermentans</i>        | WP_142730224.1   | DSG | TGTT        | GTGVSSS |
| <i>Paraclostridium bifermentans</i>        | WP_025162002.1   | DSG | TGTI        | GTGVSSS |
| <i>Romboutsia hominis</i>                  | CEI72316.1       | DSG | TGTT        | GTGVSSS |
| <i>Paraclostridium benzoelyticum</i>       | WP_046821862.1   | DSG | TGTI        | GTGVSTS |
| <i>Romboutsia weinsteini</i>               | WP_094369213.1   | DSG | TGTM        | GTGISSS |
| <i>Paraclostridium benzoelyticum</i>       | OXX84577.1       | DSG | TGTI        | GTGVSSS |
| <i>Romboutsia lituseburensis</i>           | WP_092722643.1   | DSG | TGTM        | GTGISSS |
| <i>Clostridioides manganotii</i>           | WP_024620345.1   | DSG | TGTM        | GTGVSSS |
| <i>Romboutsia</i> sp. Marseille-P6047      | WP_122638577.1   | DSG | TGTM        | GTGISSS |
| <i>Clostridioides manganotii</i>           | WP_027702696.1   | DSG | TGTI        | GTGISSS |
| <i>Peptostreptococcaceae bacterium</i> VA2 | WP_026901720.1   | DSG | TGTM        | GTGISSS |
| <i>Clostridioides manganotii</i>           | WP_024620469.1   | DSG | TGTI        | GTGVSSS |
| <i>Romboutsia timonensis</i>               | WP_071121077.1   | DSG | TGTI        | GTGISAS |
| <i>Asaccharospora irregularis</i>          | WP_073125363.1   | DSG | TGTI        | GTGVSSS |
| <i>Romboutsia ilealis</i>                  | CED93324.1       | DSG | TGTI        | GTGVSSS |
| <i>Terrisporobacter glycolicus</i>         | WP_148557830.1   | DSG | TGTL        | GTGVSSS |
| <i>Terrisporobacter glycolicus</i>         | WP_018589415.1   | DSG | TGTL        | GTGVSSS |

## References

- 1 Francis, M. B., Allen, C. A., Shrestha, R. and Sorg, J. A. (2013) Bile acid recognition by the *Clostridium difficile* germinant receptor, CspC, is important for establishing infection. PLoS Pathog. **9**, e1003356
- 2 Kochan, T. J., Foley, M. H., Shoshiev, M. S., Somers, M. J., Carlson, P. E. and Hanna, P. C. (2018) Updates to *Clostridium difficile* Spore Germination. J Bacteriol. **200**
- 3 Rohlfing, A. E., Eckenroth, B. E., Forster, E. R., Kevorkian, Y., Donnelly, M. L., Benito de la Puebla, H., Doublie, S. and Shen, A. (2019) The CspC pseudoprotease regulates germination of *Clostridioides difficile* spores in response to multiple environmental signals. PLoS Genet. **15**, e1008224
- 4 Shen, A., Lupardus, P. J., Albrow, V. E., Guzzetta, A., Powers, J. C., Garcia, K. C. and Bogyo, M. (2009) Mechanistic and structural insights into the proteolytic activation of *Vibrio cholerae* MARTX toxin. Nat Chem Biol. **5**, 469-478
- 5 Donnelly, M. L., Li, W., Li, Y. Q., Hinkel, L., Setlow, P. and Shen, A. (2017) A *Clostridium difficile*-Specific, Gel-Forming Protein Required for Optimal Spore Germination. mBio. **8**
- 6 Kevorkian, Y. and Shen, A. (2017) Revisiting the Role of Csp Family Proteins in Regulating *Clostridium difficile* Spore Germination. J Bacteriol. **199**
- 7 Adams, C. M., Eckenroth, B. E., Putnam, E. E., Doublie, S. and Shen, A. (2013) Structural and functional analysis of the CspB protease required for *Clostridium* spore germination. PLoS Pathog. **9**, e1003165
- 8 Ng, Y. K., Ehsaan, M., Philip, S., Collery, M. M., Janoir, C., Collignon, A., Cartman, S. T. and Minton, N. P. (2013) Expanding the repertoire of gene tools for precise manipulation of the *Clostridium difficile* genome: allelic exchange using *pyrE* alleles. PLoS One. **8**, e56051
- 9 Shen, A., Lupardus, P. J., Morell, M., Ponder, E. L., Sadaghiani, A. M., Garcia, K. C. and Bogyo, M. (2009) Simplified, enhanced protein purification using an inducible, autoprocessing enzyme tag. PLoS One. **4**, e8119
